# Supplementary material for: Reevaluation of the Toxoplasma gondii and Neospora caninum genomes reveals misassembly, karyotype differences, and chromosomal rearrangements
Source: HighWire-hosted journal article supplement (doi:10.1101/gr.262832.120), 2021-04-27
Supplement: Supplemental_material.docx [file Supplemental_material.docx]

**SUPPLEMENTARY DATA**

**
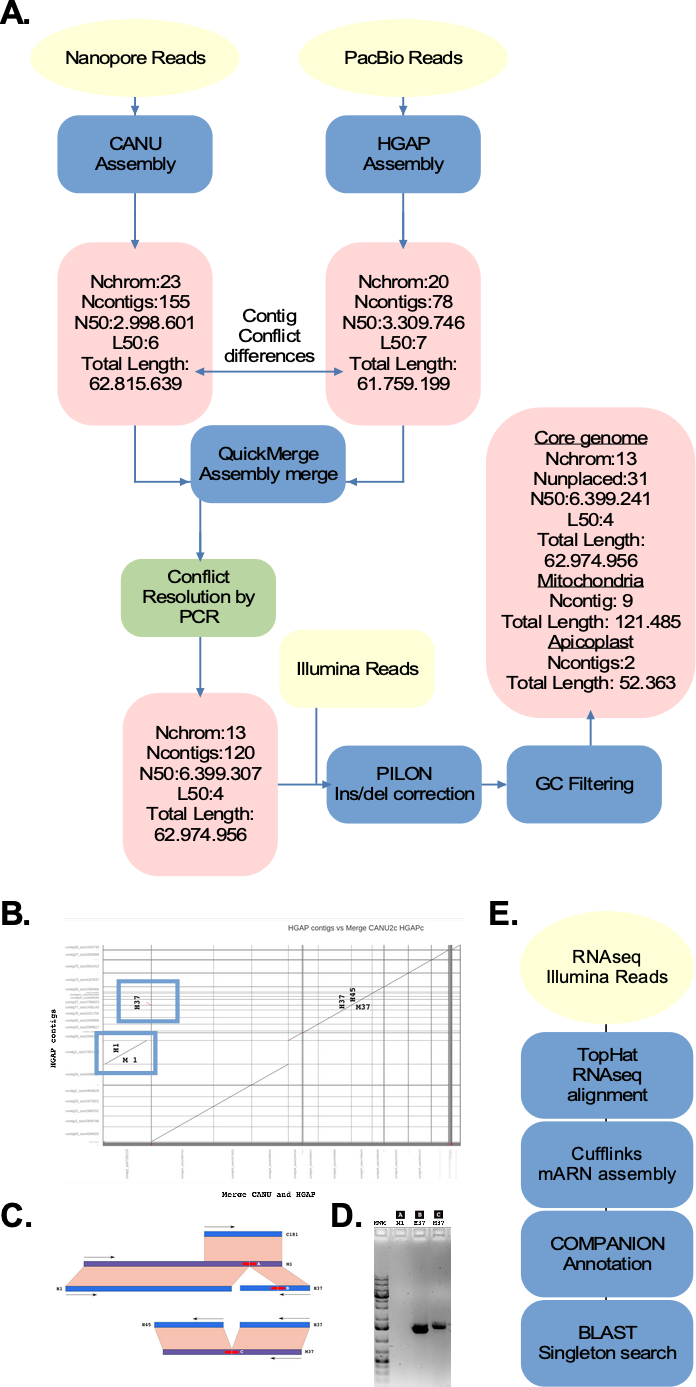
Supplementary Figure 1. New Genome Assembly and Annotation.**

**A.** Genome assembly pipeline from sequencing data**. B.** Identification of a conflict region between assemblies. **C.** Schematic representation of conflict region. Arrows represent location of oligos designed to resolve the conflict region by PCR. Expected amplicons are marked in red and labeled A-C. **D.** Resolution of conflict region by PCR. A-C correspond to regions marked in red in C. **E.** *De novo* gene annotation pipeline.

**
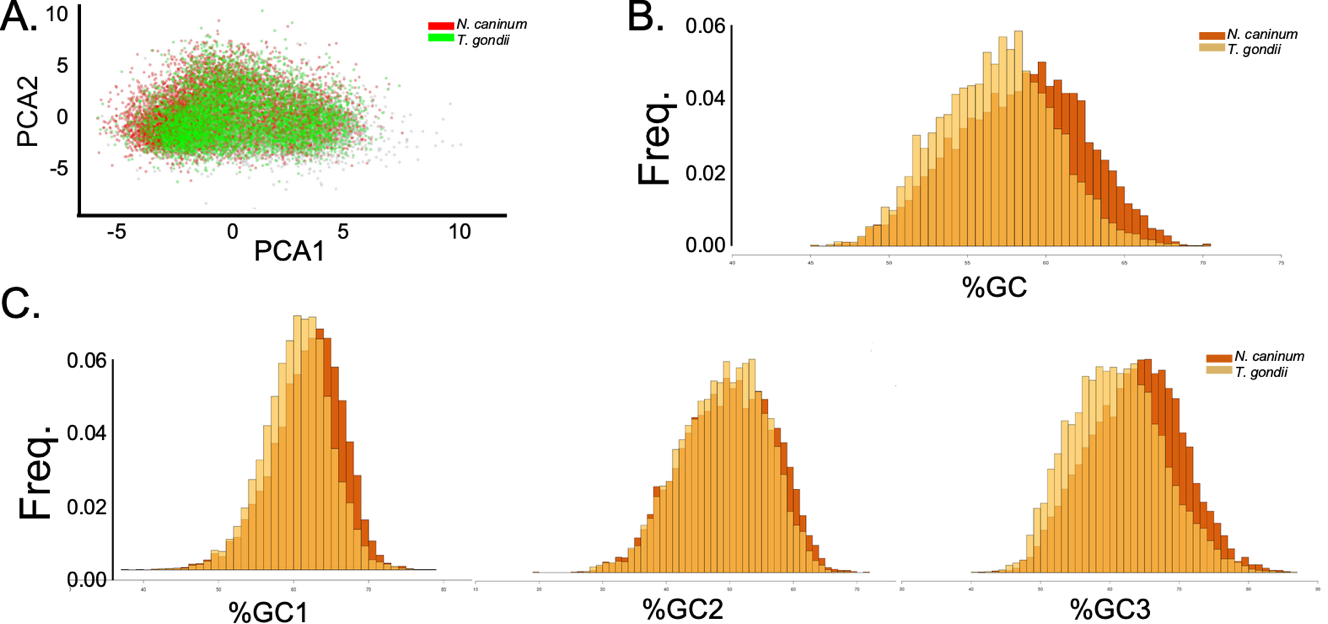
**

**Supplementary Figure 2. Comparative analysis of GC content and codon usage between *Neospora caninum* and *Toxoplasma gondii*. A.** Genome-wide comparative PCA analysis of all gene coding sequences in *N. caninum* and *T. gondii*. **B.** Comparative analysis of GC content between orthologous genes of *N. caninum* and *T. gondii.* **C.** Comparative analysis of GC percentage between equal position at codons in orthologous genes of *N. caninum* and *T. gondii.*

**
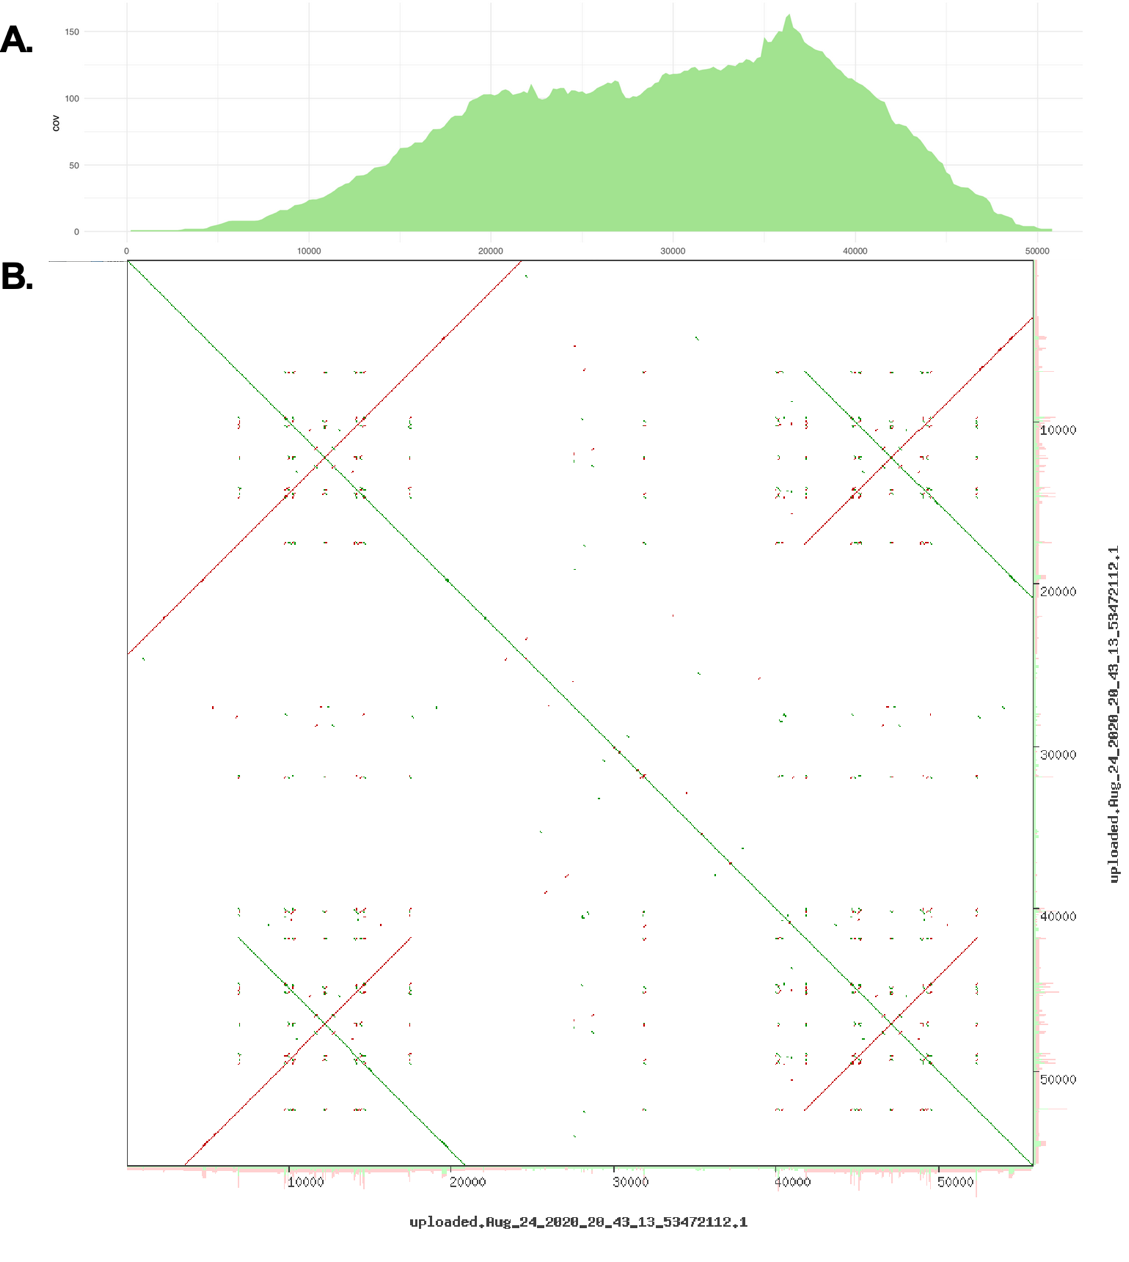
**

**Supplementary Figure 3. Evaluation of the Apicoplast genome data support. A. Plot of the sequence coverage along the length of apicoplast contigs manually merged into a single molecule of 55kb.** Note that the coverage is not homogenous and it significantly increases in the region where inverted repeats are found, suggesting that the artificially generated circular model underestimates number of repeats present. **B. Dot plot generated in Yass.**

**
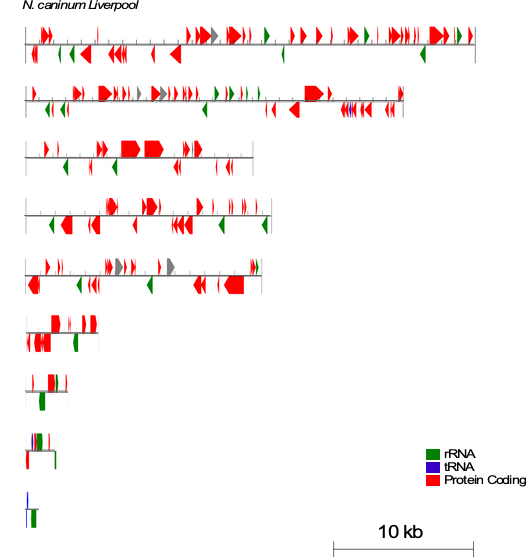
**

**Supplementary Figure 4. Gene structure along *N. caninum* Liverpool mitochondrial contigs.** Predicted open reading frames by MITOS are shown for nine contigs assigned to the mitochondrial genome. Note that although tRNAs (in blue) are putatively identified by MITOS in three of the contigs, these have very low statistical support and should therefore not be considered as *bona fide* tRNA coding sequences. See Supplementary Table 6 for detailed information on the annotation of each contig.

***
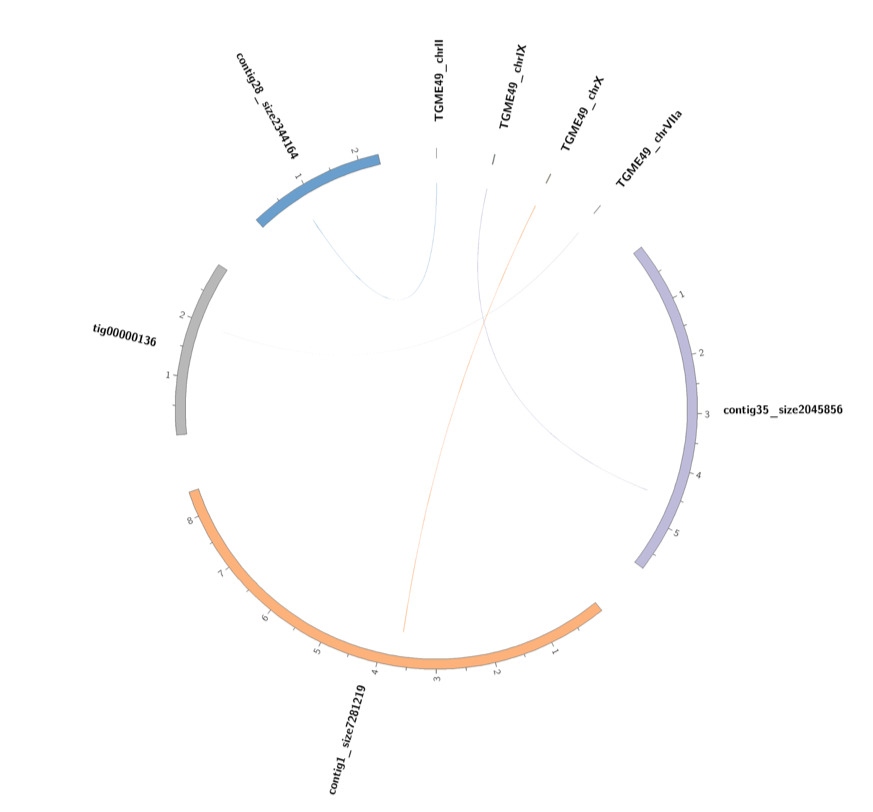
***

**Supplementary Figure 5. Centromeres identification by homology with *T. gondii***

Circos plot. The centromeric sequences of *T. gondii*’s chromosomes II, IX, X and VIIa can be found by blast searches in corresponding chromosomes of *N. caninum*. See Supplementary Table 2 for detailed information.


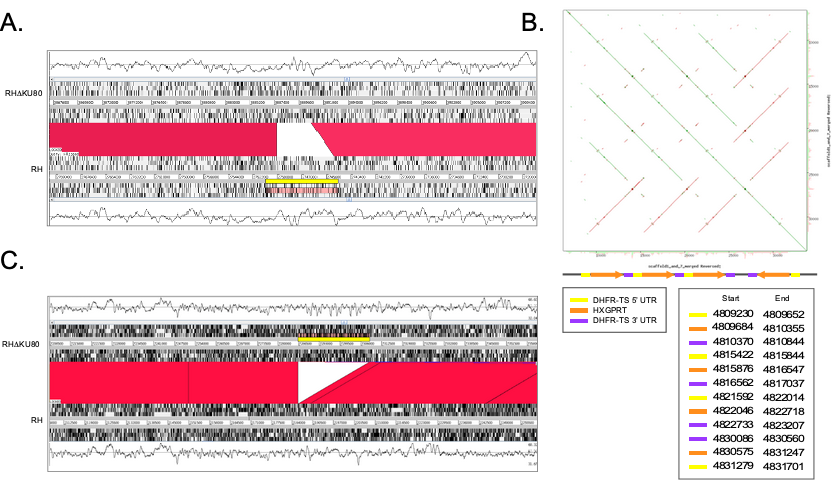


**Supplementary Figure 6. Genomic feature of the RHDKu80 *T. gondii* strain**. **A.** Comparative analysis of a region of chromosome XI, containing the gene coding for the Ku80 protein in *T. gondii* (TgME49_ 312510). The coding sequence of the gene has been completely substituted, leaving behind its UTR coding regions intact in the locus. **B**. Yass plot of Chromosome VIII of the *T. gondii* RHDKu80. Multiple copies of the mutagenic plasmid used to generate de Ku80 deletion, arrayed as shown below the plot at the specified coordinates shown in the accompanying table, are inserted. **C.** Comparative analysis of a region of chromosome VIII of *T. gondii* RH strain with the RHDKu80 strain. The gene, TGVEG_232590, whose product is annotated as glutamate-cysteine ligase catalytic subunit domain-containing protein, is interrupted by the insertion of the mutagenic vector.


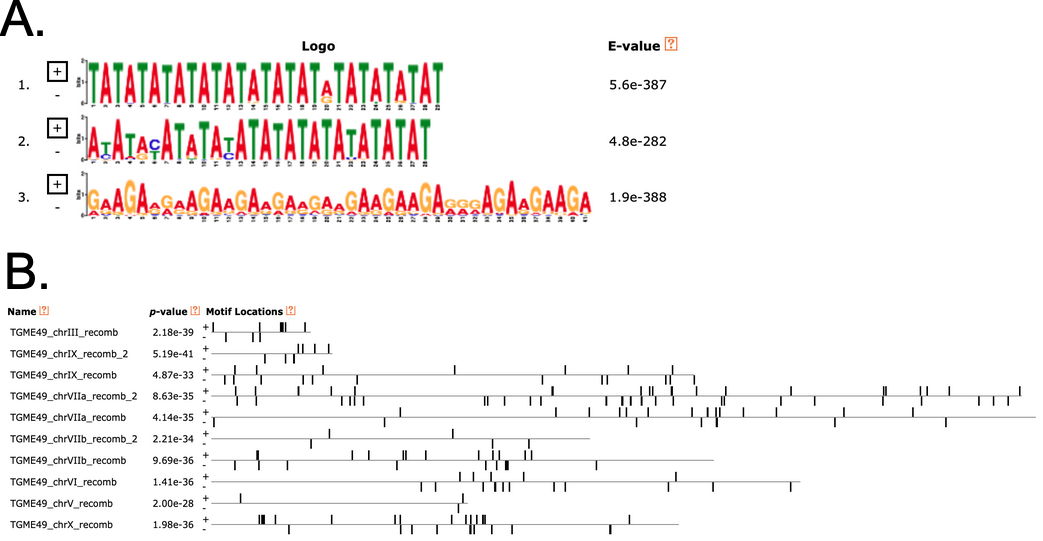


**Supplementary Figure 7**. Presence of conserved domains in region of chromosomal rearrangements between *N. caninum* and *T. gondii* in the *T. gondii* genome**. A.** Domain sequence identified at regions of chromosomal rearrangements in the *T. gondii* genome. Note that these domains are virtually identical to those identified at regions of synteny break between *N. caninum* and *T. gondii*, in the *N. caninum* genome. **B.** Location of sequence domains along chromosomes that suffer rearrangements with respect to the *N. caninum* genome in *T. gondii*.

**Supplementary Table 1. Telomeres position and composition per chromosome of *N. caninum*.**

Note that the 5’ telomere sequence corresponds to a repetitive sequence of 5’ AAACCCT 3’, while the 3’ telomere corresponds to repetitive elements of 5’TTTAGGG 3’. Note that we could not identify the 3’ telomere in three of the chromosomes.

**Supplementary Table2. *In Silico* identified centromere position per chromosome in *N. caninum***

**Supplementary Table 3. Number of domains present at sites of chromosomal rearrangements between *N. caninum* and *T. gondii***

| | **Number of Domains** | **Chromosome** | | --- | --- | | Domain I | | | 3 | **I** | | 12 | **X** | | 1 | **IV** | | 6 | **VIII** | | 2 | **VIII** | | 11 | **VIII** | | 2 | **VII** | | 1 | **V I** | | 22 | **VI** | |  |  | | Domain II | | | 4 | **I** | | 14 | **X** | | 1 | **IV** | | 6 | **VIII** | | 2 | **VIII** | | 10 | **VIII** | | 1 | **VII** | | 3 | **VI** | | 19 | **VI** | |  |  | | Domain III | | | 2 | **I** | | 20 | **X** | | 1 | **IV** | | 4 | **VIII** | | 4 | **VIII** | | 12 | **VIII** | | 2 | **VII** | | 2 | **VI** | | 13 | **VI** | |
| --- | --- | --- | --- | --- | --- | --- | --- | --- | --- | --- | --- | --- | --- | --- | --- | --- | --- | --- | --- | --- | --- | --- | --- | --- | --- | --- | --- | --- | --- | --- | --- | --- | --- | --- | --- | --- | --- | --- | --- | --- | --- | --- | --- | --- | --- | --- | --- | --- | --- | --- | --- | --- | --- | --- | --- | --- | --- | --- | --- | --- | --- | --- | --- | --- | --- | --- |

Those marked in yellow are graphically represented in Figures 2A and B.

**Supplementary Table 4. Newly annotated genes in *N. caninum***

|  |  | **Position** | |  |  |
| --- | --- | --- | --- | --- | --- |
| **Name** | **Chromo**  **some** | **Start** | **End** | **Strand** | **Annotation** |
| Ncaninum_LIV_000040800 | III | 2756988 | 2757329 | + | hypothetical protein |
| Ncaninum_LIV_000092200 | III | 6574386 | 6575370 | + | hypothetical protein |
| Ncaninum_LIV_000143300 | III | 10338904 | 10341476 | + | hypothetical protein |
| Ncaninum_LIV_000152100 | IV | 422595 | 424224 | + | hypothetical protein |
| Ncaninum_LIV_000171200 | IV | 1867538 | 1868501 | + | hypothetical protein |
| Ncaninum_LIV_000186100 | IV | 3004588 | 3006200 | - | hypothetical protein |
| Ncaninum_LIV_000209700 | IV | 4896040 | 4898308 | + | hypothetical protein |
| Ncaninum_LIV_000241200 | IV | 7269582 | 7269956 | + | hypothetical protein |
| Ncaninum_LIV_000316000 | II | 4946914 | 4947813 | - | hypothetical protein |
| Ncaninum_LIV_000334400 | II | 6357413 | 6359132 | + | hypothetical protein |
| Ncaninum_LIV_000335800 | II | 6450096 | 6457891 | + | Syntaxin 6, N-terminal/SNARE domain containing protein, putative |
| Ncaninum_LIV_000337600 | V | 161021 | 168938 | - | SPX domain/VTC domain/Domain of unknown function (DUF202), putative |
| Ncaninum_LIV_000337700 | V | 169821 | 171679 | + | hypothetical protein |
| Ncaninum_LIV_000337800 | V | 175587 | 185784 | - | GYF domain containing protein, putative |
| Ncaninum_LIV_000337900 | V | 190694 | 194963 | - | Kelch motif/Galactose oxidase, central domain/BTB/POZ domain containing protein, putative |
| Ncaninum_LIV_000359300 | V | 1814891 | 1816667 | - | hypothetical protein |
| Ncaninum_LIV_000365500 | V | 2206943 | 2208551 | + | hypothetical protein |
| Ncaninum_LIV_000375300 | V | 3029943 | 3035737 | + | hypothetical protein |
| Ncaninum_LIV_000433400 | IX | 1191925 | 1194449 | - | hypothetical protein |
| Ncaninum_LIV_000443600 | IX | 1949801 | 1951820 | - | hypothetical protein |
| Ncaninum_LIV_000460800 | I | 258778 | 262081 | + | hypothetical protein |
| Ncaninum_LIV_000464000 | I | 438337 | 440759 | - | hypothetical protein |
| Ncaninum_LIV_000470800 | I | 936856 | 938990 | - | hypothetical protein |
| Ncaninum_LIV_000491800 | I | 2471879 | 2478685 | + | hypothetical protein |
| Ncaninum_LIV_000509300 | I | 3952893 | 3953246 | - | hypothetical protein |
| Ncaninum_LIV_000518100 | I | 4594012 | 4596091 | + | hypothetical protein |
| Ncaninum_LIV_000530900 | VI | 47621 | 48555 | - | hypothetical protein |
| Ncaninum_LIV_000538100 | VI | 798870 | 803814 | + | Glutathione S-transferase, N-terminal domain containing protein, putative |
| Ncaninum_LIV_000561400 | VI | 2527773 | 2530092 | + | hypothetical protein |
| Ncaninum_LIV_000581700 | VIII | 56451 | 57448 | - | hypothetical protein |
| Ncaninum_LIV_000581800 | VIII | 173077 | 174286 | - | hypothetical protein |
| Ncaninum_LIV_000599400 | VIII | 1451743 | 1459699 | + | hypothetical protein |
| Ncaninum_LIV_000618600 | VIII | 2918675 | 2922286 | + | hypothetical protein |
| Ncaninum_LIV_000651200 | X | 1833400 | 1835279 | - | hypothetical protein |
| Ncaninum_LIV_000699900 | VII | 2009169 | 2011251 | + | hypothetical protein |
| Ncaninum_LIV_000733300 | XII | 54627 | 56140 | - | hypothetical protein |
| Ncaninum_LIV_000783700 | Nc_unp_26 | 1 | 2840 | + | Cyclophilin type peptidyl-prolyl cis-trans isomerase/CLD, putative |
| Ncaninum_LIV_000784100 | Nc_unp_3 | 44957 | 45370 | + | hypothetical protein |

|  |
| --- |

**Supplementary Table 5. Apicoplast gene annotation of *N. caninum* Liverpool**

**Supplementary Table 6. Mitochondrial gene annotation of the largest 7 contigs of *N. caninum* Liverpool**

**Supplementary Table 7. Detailed description of large repetitive sequence regions in the newly assembled *N. caninum* genomes**

| **Nc Liv** | **Nc Liv Chr** | **Start** | **End** | **Length** | **Period Size** | **Copy Number** | **Corresponding Repeat in Nc Uru1** | **Nc Uru1 Chr** | **Start** | **End** | **Length** | **Period Size** | **Copy Number** | **Genes** |
| --- | --- | --- | --- | --- | --- | --- | --- | --- | --- | --- | --- | --- | --- | --- |
| rep10_Nc_II | Nc_II | 100789 | 106230 | 5441 | 1633 | 3.3 | rep_39_Nc_Uru1 | 3_prev_scaffold1 | 7604342 | 7611010 | 6668 | 1630 | 4.1 |  |
| rep12_Nc_II | Nc_II | 3979064 | 3984443 | 5379 | 807 | 6.7 | rep_38_Nc_Uru1 | 3_prev_scaffold1 | 3723997 | 3729376 | 5379 | 807 | 6.7 |  |
| rep13_Nc_II | Nc_II | 4036526 | 4049404 | 12878 | 816 | 15.8 | rep_37_Nc_Uru1 | 3_prev_scaffold1 | 3652531 | 3671934 | 19403 | 816 | 23.8 |  |
| rep14_Nc_II | Nc_II | 6748067 | 6754865 | 6798 | 1254 | 5.5 | rep_36_Nc_Uru1 | 3_prev_scaffold1 | 943056 | 949856 | 6800 | 1236 | 5.5 |  |
| rep16_Nc_IX | Nc_IX | 47292 | 57961 | 10669 | 1043 | 10.2 | rep_1_Nc_Uru1 | 1_prev_scaffold1 | 43105 | 53773 | 10668 | 1043 | 10.2 |  |
| rep18_Nc_V | Nc_V | 5654624 | 5660410 | 5786 | 1842 | 3.1 | rep_32_Nc_Uru1 | 25_prev_scaffold13 | 146513 | 152298 | 5785 | 1842 | 3.1 |  |
| rep19_Nc_V | Nc_V | 5664480 | 5677910 | 13430 | 1677 | 8 | rep_31_Nc_Uru1 | 25_prev_scaffold13 | 125663 | 142443 | 16780 | 1678 | 10 |  |
| rep1_Nc_I | Nc_I | 12686 | 27118 | 14432 | 755 | 19.1 | rep_76_Nc_Uru1 | 7_prev_scaffold3 | 10279 | 25466 | 15187 | 755 | 20.1 | ID=Ncaninum_LIV_000005000.1:;product=term: **hypothetical protein** |
| rep20_Nc_V | Nc_V | 5705842 | 5711853 | 6011 | 1701 | 3.5 | rep_30_Nc_Uru1 | 25_prev_scaffold13 | 88319 | 97735 | 9416 | 1700 | 5.5 |  |
| rep21_Nc_VI | Nc_VI | 15213 | 29728 | 14515 | 1456 | 10 | rep_71_Nc_Uru1 | 56_prev_scaffold32 | 3812 | 26648 | 22836 | 1453 | 15.7 |  |
| rep22_Nc_VI | Nc_VI | 30044 | 35818 | 5774 | 1454 | 4 |  |
| rep23_Nc_VI | Nc_VI | 40958 | 61463 | 20505 | 1715 | 11.9 | rep_2_Nc_Uru1 | 14_prev_scaffold5 | 9188 | 29693 | 20505 | 1715 | 11.9 | ID=Ncaninum_LIV_000530900.1;product=term: **hypothetical protein** |
| rep24_Nc_VI | Nc_VI | 63695 | 70401 | 6706 | 1557 | 4.3 | rep_3_Nc_Uru1 | 14_prev_scaffold5 | 31925 | 38632 | 6707 | 1558 | 4.3 |  |
| rep26_Nc_VII | Nc_VII | 18383 | 27935 | 9552 | 1647 | 5.7 | rep_12_Nc_Uru1 | 15_prev_scaffold6 | 3208975 | 3228390 | 19415 | 1646 | 11.6 |  |
| rep27_Nc_VII | Nc_VII | 32285 | 43438 | 11153 | 1713 | 6.5 | rep_11_Nc_Uru1 | 15_prev_scaffold6 | 3193473 | 3204625 | 11152 | 1713 | 6.5 |  |
| rep28_Nc_VII | Nc_VII | 45759 | 55105 | 9346 | 1561 | 6 | rep_10_Nc_Uru1 | 15_prev_scaffold6 | 3181637 | 3191152 | 9515 | 1561 | 6.1 |  |
| rep29_Nc_VII | Nc_VII | 79440 | 87034 | 7594 | 1718 | 4.4 | rep_9_Nc_Uru1 | 15_prev_scaffold6 | 3149880 | 3157473 | 7593 | 1722 | 4.4 |  |
| rep2_Nc_I | Nc_I | 6816060 | 6826410 | 10350 | 213 | 48.6 | rep_22_Nc_Uru1 | 2_prev_scaffold1 | 4038977 | 4051438 | 12461 | 213 | 58.6 |  |
| rep30_Nc_VII | Nc_VII | 92778 | 101018 | 8240 | 1687 | 4.9 | rep_8_Nc_Uru1 | 15_prev_scaffold6 | 3136793 | 3144136 | 7343 | 1687 | 4.3 |  |
| rep31_Nc_VII | Nc_VII | 115132 | 120804 | 5672 | 1611 | 3.5 | rep_7_Nc_Uru1 | 15_prev_scaffold6 | 3116108 | 3121781 | 5673 | 1611 | 3.5 |  |
| rep33_Nc_VII | Nc_VII | 828999 | 834122 | 5123 | 804 | 6.4 | rep_5_Nc_Uru1 | 15_prev_scaffold6 | 2414686 | 2419809 | 5123 | 804 | 6.4 |  |
| rep34_Nc_VII | Nc_VII | 1601880 | 1617147 | 15267 | 171 | 89.3 | rep_4_Nc_Uru1 | 15_prev_scaffold6 | 1633036 | 1647108 | 14072 | 171 | 82.3 |  |
| rep35_Nc_VIII | Nc_VIII | 37581 | 44613 | 7032 | 1726 | 4.1 | rep_47_Nc_Uru1 | 30_prev_scaffold17 | 104760 | 111792 | 7032 | 1726 | 4.1 |  |
| rep36_Nc_VIII | Nc_VIII | 47080 | 52155 | 5075 | 1748 | 2.9 | rep_46_Nc_Uru1 | 30_prev_scaffold17 | 97219 | 102294 | 5075 | 1748 | 2.9 |  |
| rep37_Nc_VIII | Nc_VIII | 63657 | 68916 | 5259 | 1749 | 3 | rep_45_Nc_Uru1 | 30_prev_scaffold17 | 80459 | 86298 | 5839 | 1749 | 3.3 |  |
| rep38_Nc_VIII | Nc_VIII | 70918 | 86322 | 15404 | 1351 | 11.4 | rep_44_Nc_Uru1 | 30_prev_scaffold17 | 63055 | 78457 | 15402 | 1351 | 11.4 | ID=Ncaninum_LIV_000632100.1:Ncaninum_LIV_000632100. Ncaninum_LIV_000631900.1,Ncaninum_LIV_000632000.1;ortholog_cluster=ORTHOMCL111;product=term: **hypothetical protein** |
| rep39_Nc_VIII | Nc_VIII | 101536 | 107988 | 6452 | 1725 | 3.7 | rep_43_Nc_Uru1 | 30_prev_scaffold17 | 41388 | 47843 | 6455 | 1725 | 3.7 |  |
| rep3_Nc_I | Nc_I | 10710071 | 10715721 | 5650 | 443 | 12.7 | rep_21_Nc_Uru1 | 2_prev_scaffold1 | 148535 | 156189 | 7654 | 443 | 17.2 | . ID=Ncaninum_LIV_000148100.1:orthologous_to=NCLIV_068720.1;ortholog_cluster=ORTHOMCL308;product=term 50S ribosomal protein chloroplastic |
| rep40_Nc_VIII | Nc_VIII | 117429 | 122469 | 5040 | 1352 | 3.7 | rep_42_Nc_Uru1 | 30_prev_scaffold17 | 26907 | 31947 | 5040 | 1352 | 3.7 |  |
| rep41_Nc_VIII | Nc_VIII | 125675 | 130696 | 5021 | 1800 | 2.8 | rep_41_Nc_Uru1 | 30_prev_scaffold17 | 18680 | 23701 | 5021 | 1800 | 2.8 |  |
| rep42_Nc_VIII | Nc_VIII | 146232 | 155070 | 8838 | 893 | 9.9 | rep_23_Nc_Uru1 | 20_prev_scaffold10 | 1 | 8734 | 8733 | 895 | 9.8 |  |
| rep44_Nc_VIII | Nc_VIII | 1034135 | 1070830 | 36695 | 1654 | 22.3 | rep_24_Nc_Uru1 | 20_prev_scaffold10 | 881872 | 920068 | 38196 | 1627 | 23.2 |  |
| rep45_Nc_VIII | Nc_VIII | 3592455 | 3597481 | 5026 | 1624 | 3.1 | rep_34_Nc_Uru1 | 29_prev_scaffold16 | 437948 | 442979 | 5031 | 1622 | 3.1 |  |
| rep46_Nc_VIII | Nc_VIII | 3593370 | 3607680 | 14310 | 1562 | 9.1 | rep_35_Nc_Uru1 | 29_prev_scaffold16 | 438748 | 450012 | 11264 | 1562 | 7.1 |  |
| rep47_Nc_X | Nc_X | 33489 | 47265 | 13776 | 1514 | 9.1 | rep_13_Nc_Uru1 | 17_prev_scaffold8 | 30593 | 48938 | 18345 | 1523 | 12.1 |  |
| rep_73_Nc_Uru1 | 63_prev_scaffold37 | 914 | 21845 | 20931 | 1523 | 13.8 |  |
| rep48_Nc_X | Nc_X | 2606994 | 2625427 | 18433 | 1531 | 11.9 | rep_14_Nc_Uru1 | 17_prev_scaffold8 | 2590529 | 2608961 | 18432 | 1538 | 11.9 |  |
| rep49_Nc_XI | Nc_XI | 9746 | 25010 | 15264 | 1089 | 13.8 | rep_33_Nc_Uru1 | 27_prev_scaffold14 | 375619 | 394017 | 18398 | 1091 | 16.6 |  |
| rep4_Nc_I | Nc_I | 10731773 | 10746527 | 14754 | 1758 | 8.4 | rep_20_Nc_Uru1 | 2_prev_scaffold1 | 121946 | 132264 | 10318 | 1759 | 5.9 |  |
| rep51_Nc_XI | Nc_XI | 2175477 | 2186764 | 11287 | 1618 | 6.9 | rep_25_Nc_Uru1 | 22_prev_scaffold12 | 1760851 | 1772137 | 11286 | 1618 | 6.9 |  |
| rep52_Nc_XI | Nc_XI | 2209351 | 2222106 | 12755 | 1212 | 10.5 | rep_26_Nc_Uru1 | 22_prev_scaffold12 | 1794726 | 1800200 | 5474 | 1214 | 4.5 | Ncaninum_LIV_000732500.1:pep;;product=term: **hypothetical protein**, Ncaninum_LIV_000732600.1:pep;;product=term: **hypothetical protein**, Ncaninum_LIV_000732700.1:pep;;product=term: **hypothetical protein,**Ncaninum_LIV_000732800.1:pep;;product=term:**hypothetical protein**conserved, Ncaninum_LIV_000732900.1:pep;;product=term: **hypothetical protein,**Ncaninum_LIV_000733000.1:pep;;product=term: **hypothetical protein** conserved, Ncaninum_LIV_000733100.1:pep;;product=term: **hypothetical protein** conserved, Ncaninum_LIV_000733200.1:pep;;product=term: **hypothetical protein** conserved |
| rep52_Nc_XI | Nc_XI | 2209351 | 2222106 | 12755 | 1212 | 10.5 | rep_60_Nc_Uru1 | 33_prev_scaffold18 | 140207 | 153741 | 13534 | 1211 | 11.2 |
| rep_72_Nc_Uru1 | 61_prev_scaffold35 | 1 | 14321 | 14320 | 1213 | 11.8 |
| rep_74_Nc_Uru1 | 64_prev_scaffold38 | 1 | 5362 | 5361 | 1211 | 4.4 |
| rep_75_Nc_Uru1 | 68_prev_scaffold42 | 1 | 13888 | 13887 | 1216 | 11.4 |
| rep_78_Nc_Uru1 | 75_prev_scaffold48 | 1 | 5017 | 5016 | 1208 | 4.2 |
| rep53_Nc_XI | Nc_XI | 2238966 | 2270202 | 31236 | 1609 | 19.4 | rep_70_Nc_Uru1 | 55_prev_scaffold31 | 29 | 19608 | 19579 | 1605 | 12.2 |
| rep54_Nc_XI | Nc_XI | 2273541 | 2284709 | 11168 | 1635 | 6.8 | rep_51_Nc_Uru1 | 31_prev_scaffold18 | 41448 | 51686 | 10238 | 1668 | 6.2 |
| rep55_Nc_XI | Nc_XI | 2308762 | 2330931 | 22169 | 1671 | 13.2 | rep_29_Nc_Uru1 | 23_prev_scaffold12 | 1 | 6339 | 6338 | 1666 | 3.8 |
| rep55_Nc_XI | Nc_XI | 2308762 | 2330931 | 22169 | 1671 | 13.2 | rep_65_Nc_Uru1 | 39_prev_scaffold23 | 7911 | 28223 | 20312 | 1671 | 12.2 |
| rep56_Nc_XII | Nc_XII | 106241 | 112861 | 6620 | 1694 | 3.9 | rep_15_Nc_Uru1 | 18_prev_scaffold8 | 1958928 | 1965549 | 6621 | 1694 | 3.9 |
| rep57_Nc_unp_1 | Nc_unp_1 | 22908 | 38589 | 15681 | 1633 | 9.5 | rep_51_Nc_Uru1 | 31_prev_scaffold18 | 41448 | 51686 | 10238 | 1668 | 6.2 |
| rep57_Nc_unp_1 | Nc_unp_1 | 22908 | 38589 | 15681 | 1633 | 9.5 | rep_52_Nc_Uru1 | 32_prev_scaffold18 | 15146 | 30835 | 15689 | 1635 | 9.5 |
| rep59_Nc_unp_1 | Nc_unp_1 | 56763 | 70431 | 13668 | 1613 | 8.5 | rep_54_Nc_Uru1 | 32_prev_scaffold18 | 54976 | 64908 | 9932 | 1613 | 6.2 |
| rep_56_Nc_Uru1 | 32_prev_scaffold18 | 75670 | 81886 | 6216 | 1611 | 3.9 |
| rep5_Nc_I | Nc_I | 10757983 | 10765897 | 7914 | 1362 | 5.8 | rep_18_Nc_Uru1 | 2_prev_scaffold1 | 98810 | 106724 | 7914 | 1362 | 5.8 |
| rep60_Nc_unp_1 | Nc_unp_1 | 91623 | 98291 | 6668 | 1211 | 5.5 | rep_26_Nc_Uru1 | 22_prev_scaffold12 | 1794726 | 1800200 | 5474 | 1214 | 4.5 |
| rep_60_Nc_Uru1 | 33_prev_scaffold18 | 140207 | 153741 | 13534 | 1211 | 11.2 |
| rep_72_Nc_Uru1 | 61_prev_scaffold35 | 1 | 14321 | 14320 | 1213 | 11.8 |
| rep_74_Nc_Uru1 | 64_prev_scaffold38 | 1 | 5362 | 5361 | 1211 | 4.4 |
| rep_75_Nc_Uru1 | 68_prev_scaffold42 | 1 | 13888 | 13887 | 1216 | 11.4 |
| rep_78_Nc_Uru1 | 75_prev_scaffold48 | 1 | 5017 | 5016 | 1208 | 4.2 |
| rep61_Nc_unp_15 | Nc_unp_15 | 1570 | 14701 | 13131 | 1216 | 10.8 | rep_26_Nc_Uru1 | 22_prev_scaffold12 | 1794726 | 1800200 | 5474 | 1214 | 4.5 |
| rep_60_Nc_Uru1 | 33_prev_scaffold18 | 140207 | 153741 | 13534 | 1211 | 11.2 |
| rep_72_Nc_Uru1 | 61_prev_scaffold35 | 1 | 14321 | 14320 | 1213 | 11.8 |
| rep_74_Nc_Uru1 | 64_prev_scaffold38 | 1 | 5362 | 5361 | 1211 | 4.4 |
| rep_75_Nc_Uru1 | 68_prev_scaffold42 | 1 | 13888 | 13887 | 1216 | 11.4 |
| rep_78_Nc_Uru1 | 75_prev_scaffold48 | 1 | 5017 | 5016 | 1208 | 4.2 |
| rep62_Nc_unp_15 | Nc_unp_15 | 14701 | 21343 | 6642 | 1201 | 5.5 | rep_26_Nc_Uru1 | 22_prev_scaffold12 | 1794726 | 1800200 | 5474 | 1214 | 4.5 |
| rep_60_Nc_Uru1 | 33_prev_scaffold18 | 140207 | 153741 | 13534 | 1211 | 11.2 |
| rep_72_Nc_Uru1 | 61_prev_scaffold35 | 1 | 14321 | 14320 | 1213 | 11.8 |
| rep_74_Nc_Uru1 | 64_prev_scaffold38 | 1 | 5362 | 5361 | 1211 | 4.4 |
| rep_78_Nc_Uru1 | 75_prev_scaffold48 | 1 | 5017 | 5016 | 1208 | 4.2 |
| rep63_Nc_unp_19 | Nc_unp_19 | 7341 | 18217 | 10876 | 1562 | 6.9 | rep_35_Nc_Uru1 | 29_prev_scaffold16 | 438748 | 450012 | 11264 | 1562 | 7.1 |
| rep64_Nc_unp_2 | Nc_unp_2 | 18478 | 32525 | 14047 | 1631 | 8.5 | rep_51_Nc_Uru1 | 31_prev_scaffold18 | 41448 | 51686 | 10238 | 1668 | 6.2 |
| rep_52_Nc_Uru1 | 32_prev_scaffold18 | 15146 | 30835 | 15689 | 1635 | 9.5 |
| rep65_Nc_unp_2 | Nc_unp_2 | 32048 | 59997 | 27949 | 1605 | 17.4 | rep_48_Nc_Uru1 | 31_prev_scaffold18 | 1 | 37857 | 37856 | 1609 | 22.8 |
| rep_50_Nc_Uru1 | 31_prev_scaffold18 | 10128 | 38114 | 27986 | 1605 | 17.4 |
| rep66_Nc_unp_2 | Nc_unp_2 | 59997 | 81706 | 21709 | 1613 | 13.5 | rep_48_Nc_Uru1 | 31_prev_scaffold18 | 1 | 37857 | 37856 | 1609 | 22.8 |
| rep_49_Nc_Uru1 | 31_prev_scaffold18 | 1 | 8730 | 8729 | 1600 | 5.5 |
| rep67_Nc_unp_2 | Nc_unp_2 | 83048 | 89036 | 5988 | 880 | 6.8 | rep_59_Nc_Uru1 | 33_prev_scaffold18 | 108301 | 126265 | 17964 | 881 | 20.4 |
| rep68_Nc_unp_2 | Nc_unp_2 | 94781 | 106635 | 11854 | 1216 | 9.8 | rep_26_Nc_Uru1 | 22_prev_scaffold12 | 1794726 | 1800200 | 5474 | 1214 | 4.5 |
| rep_60_Nc_Uru1 | 33_prev_scaffold18 | 140207 | 153741 | 13534 | 1211 | 11.2 |
| rep_72_Nc_Uru1 | 61_prev_scaffold35 | 1 | 14321 | 14320 | 1213 | 11.8 |
| rep_74_Nc_Uru1 | 64_prev_scaffold38 | 1 | 5362 | 5361 | 1211 | 4.4 |
| rep_75_Nc_Uru1 | 68_prev_scaffold42 | 1 | 13888 | 13887 | 1216 | 11.4 |
| rep_78_Nc_Uru1 | 75_prev_scaffold48 | 1 | 5017 | 5016 | 1208 | 4.2 |
| rep69_Nc_unp_21 | Nc_unp_21 | 6466 | 14838 | 8372 | 1627 | 5.1 | rep_24_Nc_Uru1 | 20_prev_scaffold10 | 881872 | 920068 | 38196 | 1627 | 23.2 |
| rep6_Nc_I | Nc_I | 10801481 | 10810370 | 8889 | 1268 | 7 | rep_17_Nc_Uru1 | 2_prev_scaffold1 | 54333 | 63222 | 8889 | 1268 | 7 |
| rep70_Nc_unp_27 | Nc_unp_27 | 61 | 10641 | 10580 | 1633 | 6.4 | rep_51_Nc_Uru1 | 31_prev_scaffold18 | 41448 | 51686 | 10238 | 1668 | 6.2 |
| rep_52_Nc_Uru1 | 32_prev_scaffold18 | 15146 | 30835 | 15689 | 1635 | 9.5 |
| rep71_Nc_unp_3 | Nc_unp_3 | 14455 | 45890 | 31435 | 1605 | 19.5 | rep_61_Nc_Uru1 | 36_prev_scaffold21 | 10519 | 25731 | 15212 | 1604 | 9.5 |
| rep_62_Nc_Uru1 | 37_prev_scaffold21 | 43 | 22787 | 22744 | 1605 | 14.2 |
| rep72_Nc_unp_3 | Nc_unp_3 | 46199 | 65038 | 18839 | 1692 | 11.2 | rep_63_Nc_Uru1 | 37_prev_scaffold21 | 43476 | 71220 | 27744 | 1636 | 16.4 |
| rep_64_Nc_Uru1 | 37_prev_scaffold21 | 58132 | 71379 | 13247 | 1689 | 7.9 |
| rep_65_Nc_Uru1 | 39_prev_scaffold23 | 7911 | 28223 | 20312 | 1671 | 12.2 |
| rep73_Nc_unp_4 | Nc_unp_4 | 11515 | 21563 | 10048 | 881 | 11.4 | rep_59_Nc_Uru1 | 33_prev_scaffold18 | 108301 | 126265 | 17964 | 881 | 20.4 |
| rep74_Nc_unp_4 | Nc_unp_4 | 22903 | 45105 | 22202 | 1606 | 13.8 | rep_58_Nc_Uru1 | 33_prev_scaffold18 | 75042 | 106965 | 31923 | 1605 | 19.9 |
| rep76_Nc_unp_6 | Nc_unp_6 | 10811 | 28239 | 17428 | 1605 | 10.9 | rep_62_Nc_Uru1 | 37_prev_scaffold21 | 43 | 22787 | 22744 | 1605 | 14.2 |
| rep7_Nc_I | Nc_I | 10819544 | 10851395 | 31851 | 845 | 37.7 | rep_16_Nc_Uru1 | 2_prev_scaffold1 | 11521 | 39807 | 28286 | 843 | 33.6 |
| rep8_Nc_II | Nc_II | 31456 | 41676 | 10220 | 1511 | 6.8 | rep_66_Nc_Uru1 | 4_prev_scaffold1 | 7072 | 17289 | 10217 | 1511 | 6.8 |
| rep9_Nc_II | Nc_II | 59378 | 64536 | 5158 | 1619 | 3.2 | rep_69_Nc_Uru1 | 49_prev_scaffold27 | 2716 | 7869 | 5153 | 1617 | 3.2 |
| rep75_Nc_unp_6 | Nc_unp_6 | 1208 | 10784 | 9576 | 1597 | 6 | rep_50_Nc_Uru1 | 31_prev_scaffold18 | 10128 | 38114 | 27986 | 1605 | 17.4 |
| rep58_Nc_unp_1 | Nc_unp_1 | 38112 | 56761 | 18649 | 1606 | 11.6 |
| rep50_Nc_XI | Nc_XI | 24248 | 29576 | 5328 | 574 | 9.3 | rep_33_Nc_Uru1 | 27_prev_scaffold14 | 375619 | 394017 | 18398 | 1091 | 16.6 |
| rep5_Nc_I | Nc_I | 10757983 | 10765897 | 7914 | 1362 | 5.8 | rep_19_Nc_Uru1 | 2_prev_scaffold1 | 106758 | 113186 | 6428 | 1347 | 4.8 |
| rep58_Nc_unp_1 | Nc_unp_1 | 38112 | 56761 | 18649 | 1606 | 11.6 | rep_27_Nc_Uru1 | 22_prev_scaffold12 | 1815760 | 1827400 | 11640 | 1609 | 7.2 |
| rep55_Nc_XI | Nc_XI | 2308762 | 2330931 | 22169 | 1671 | 13.2 | rep_28_Nc_Uru1 | 22_prev_scaffold12 | 1833248 | 1850490 | 17242 | 1689 | 10.4 |
| rep_57_Nc_Uru1 | 33_prev_scaffold18 | 21672 | 30274 | 8602 | 1689 | 5.1 |
| rep11_Nc_II | Nc_II | 110541 | 116996 | 6455 | 1607 | 4 | rep_40_Nc_Uru1 | 3_prev_scaffold1 | 7618383 | 7638126 | 19743 | 1578 | 12.5 |
| rep53_Nc_XI | Nc_XI | 2238966 | 2270202 | 31236 | 1609 | 19.4 | rep_53_Nc_Uru1 | 32_prev_scaffold18 | 30447 | 52247 | 21800 | 1609 | 13.6 |
| rep_55_Nc_Uru1 | 32_prev_scaffold18 | 65351 | 75585 | 10234 | 1613 | 6.4 |
| rep_77_Nc_Uru1 | 72_prev_scaffold45 | 1 | 7401 | 7400 | 1600 | 4.6 |
| np | np | np | np | np | np | np | rep_67_Nc_Uru1 | 45_prev_scaffold26 | 20442 | 25445 | 5003 | 1724 | 2.9 |
| np | np | np | np | np | np | np | rep_68_Nc_Uru1 | 48_prev_scaffold26 | 706 | 6410 | 5704 | 1715 | 3.3 |
| rep17_Nc_V | Nc_V | 2049425 | 2063109 | 13684 | 31 | 451.1 | np | np | np | np | np | np | np |
| rep25_Nc_VI | Nc_VI | 71640 | 90281 | 18641 | 1816 | 10.3 | np | np | np | np | np | np | np |
| rep43_Nc_VIII | Nc_VIII | 1015413 | 1022437 | 7024 | 850 | 8.3 | np | np | np | np | np | np | np |
| rep77_Nc_unp_7 | Nc_unp_7 | 9833 | 30512 | 20679 | 172 | 120.4 | np | np | np | np | np | np | np |  |

Note that repeats that are significantly amplified in N. caninum Liverpool, with respect to N. caninum Uru1 are shaded in light orange. Repeats significantly amplified in the N. caninum Uru1 genome with respect to N. caninum Liverpool are shaded in light green.
